# Supplementary material for: Oxidative Stress Induces Skin Pigmentation in Melasma by Inhibiting Hedgehog Signaling
Source: MDPI journal article supplement (doi:10.3390/antiox12111969), 2023-11-06
Supplement: s1 [file s1]

# Oxidative Stress Induces Skin Pigmentation in Melasma by Inhibiting Hedgehog Signaling

Nan-Hyung Kim and Ai-Young Lee \*

Department of Dermatology, Dongguk University Ilsan Hospital, 814 Siksa-dong,  
Ilsandong-gu, Goyang-si 410-773, Gyeonggi-do, Republic of Korea

\* Correspondence: [leeay@dumc.or.kr](mailto:leeay@dumc.or.kr); Tel.: +82-319617250

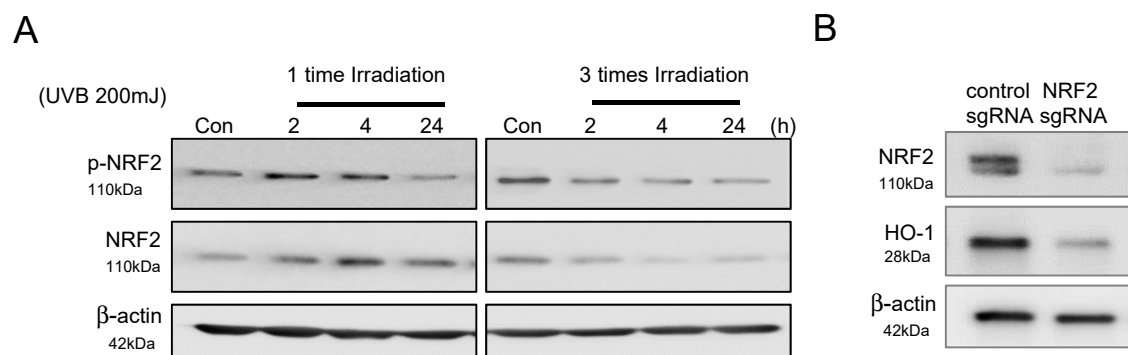

**Figure S1.** Bands from western blot analyses for Figure 1B (A) and 1D (B)

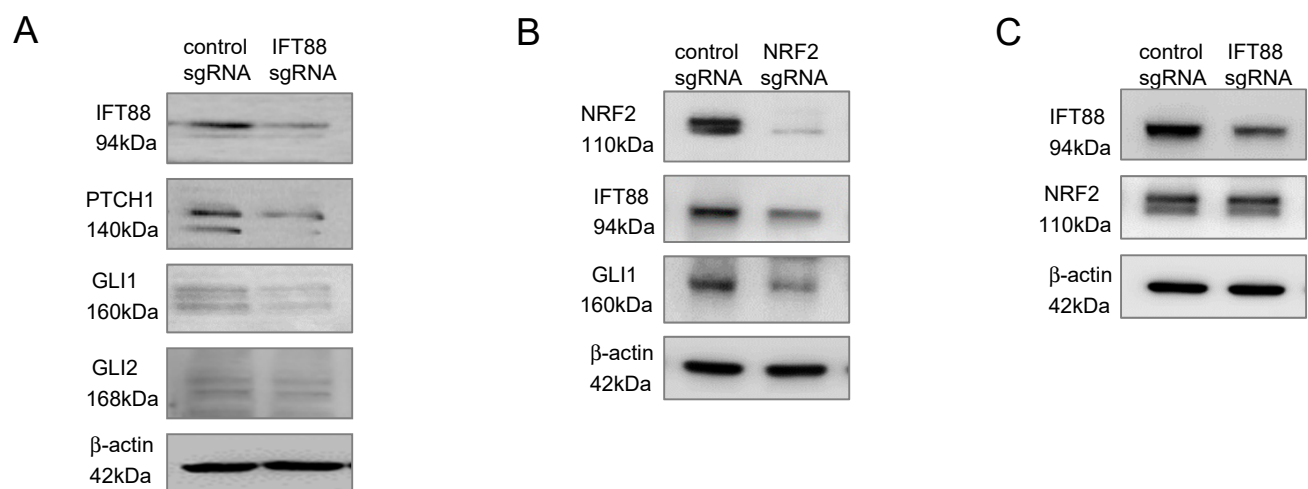

**Figure S2.** Bands from western blot analyses for Figure 2A (A), 2C (B), and 2D (C).

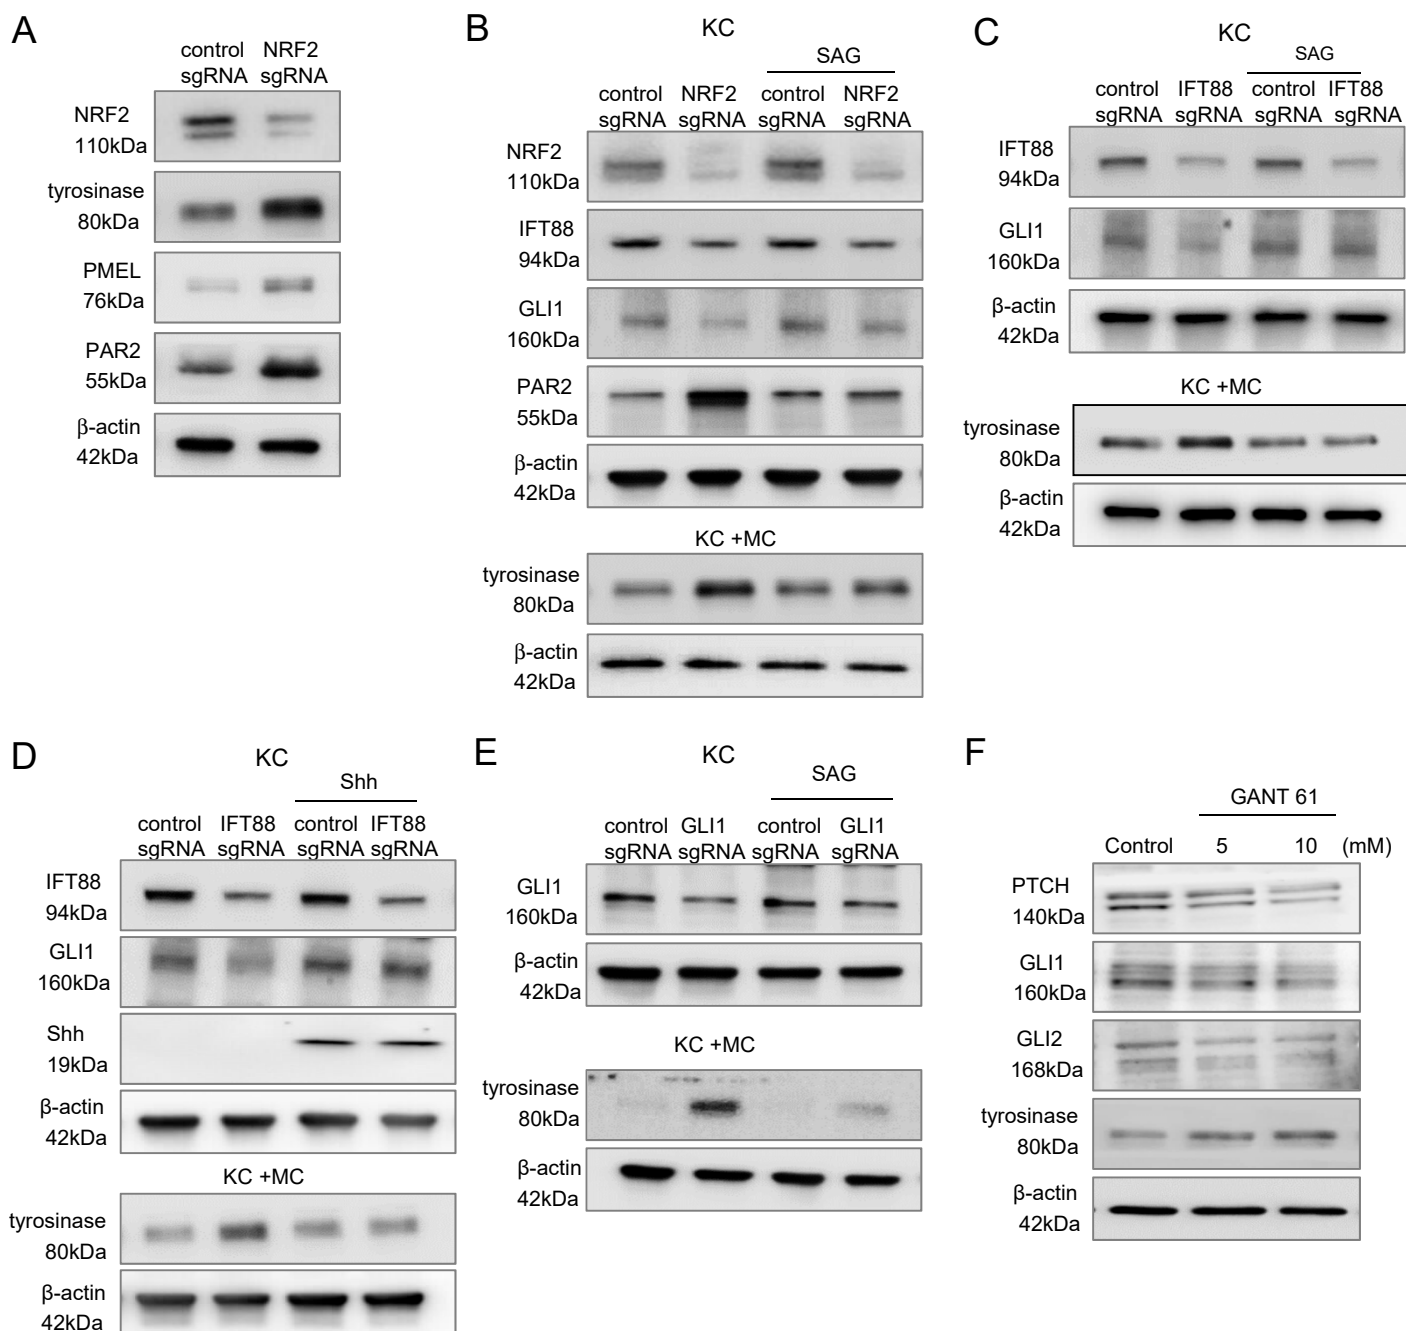

**Figure S3.** Bands from western blot analyses for Figure 3A (A), 3B (B), 3C (C), 3D (D), 3E (E), and 3F (F)

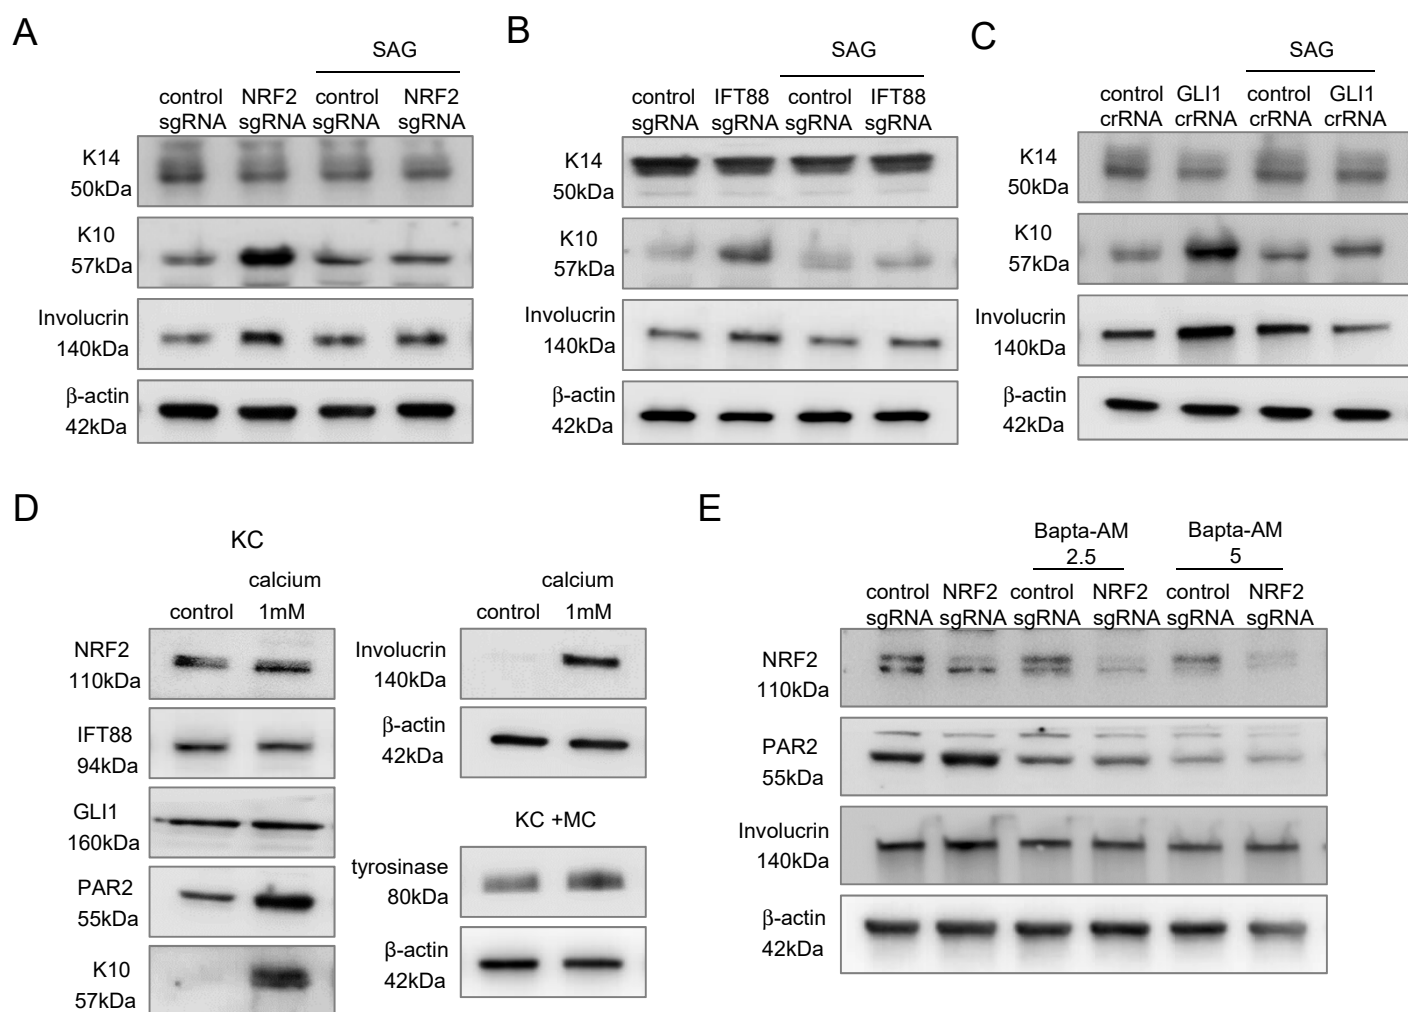

**Figure S4.** Bands from western blot analyses for Figure 4A (A), 4B (B), 4C (C), 4E (D), and 4F (E)
